# Supplementary material
Source: MDPI journal article supplement (https://www.mdpi.com/2072-4292/14/21/5629)
Supplement: s1 [file s1 › remotesensing-1938729-supplementary.pdf]

# **PySEBS V1.0.0 Actual Evapotranspiration (ETa) Calculator**

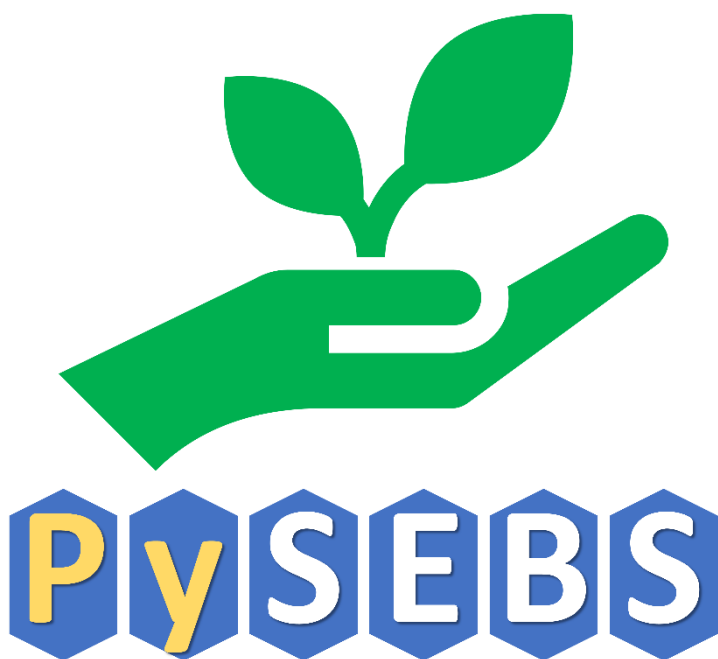

Haipeng Liu

China Agricultural University

2022-11-7

## **Software and data availability**

Software: PySEBS V1.0.0.

Developers: Haipeng Liu, Pinpin Ren, and Yong Chen.

Hardware required: General-purpose computer.

Software required: ArcGIS 10.1-10.6.

Program language: Python.

Software and data availability: PySEBS software and 2019 case data are freely distributed through a Github public repository (<https://github.com/haipengliuCAU/PySEBS>).

# **PySEBS V1.0.0 Actual Evapotranspiration (ET<sub>a</sub>) Calculator User's Guide**

by

**Haipeng Liu**

**November, 2022**

China Agricultural University  
College of Land Science and Technology

## Table of Contents

|                                                                |    |
|----------------------------------------------------------------|----|
| Table of Contents .....                                        | I  |
| List of Figures and Tables .....                               | II |
| 1. Installing the PySEBS and software requirements .....       | 1  |
| 2. Graphical User Interface Introduction .....                 | 3  |
| 2.1 Module 1 - Remote Sensing Data Processing .....            | 4  |
| 2.2 Module 2 - Meteorological Data Processing .....            | 7  |
| 2.3 Module 3 - PySEBS Calculation Procedure .....              | 12 |
| 3. PySEBS software theoretical foundation .....                | 15 |
| 3.1 Calculations of net radiation $R_n$ .....                  | 16 |
| 3.2 Calculations of soil heat flux $G_0$ .....                 | 18 |
| 3.3 Calculations of sensible heat flux $H$ .....               | 18 |
| 3.4 Calculations of evaporation ratio $\Lambda$ .....          | 24 |
| 3.5 Calculations of daily evapotranspiration $E_{daily}$ ..... | 26 |
| 3.6 Source of formula .....                                    | 28 |
| 4. Initial input data .....                                    | 30 |
| 5. Output results .....                                        | 32 |
| 6. References .....                                            | 37 |

## List of Figures and Tables

|                                                                                                                                                                                                                      |    |
|----------------------------------------------------------------------------------------------------------------------------------------------------------------------------------------------------------------------|----|
| <b>Figure S1</b> Schematic diagram of the PySEBS software file structure .....                                                                                                                                       | 1  |
| <b>Figure S2</b> The path to the bin folder in the ArcGIS installation directory, and add the<br>bin folder to the Desktop.pth file .....                                                                            | 2  |
| <b>Figure S3</b> Main menu of PySEBS software.....                                                                                                                                                                   | 3  |
| <b>Figure S4</b> Module 1 - remote sensing data processing graphical user interface.....                                                                                                                             | 5  |
| <b>Figure S5</b> Module 2 - Meteorological data processing user graphical interface.....                                                                                                                             | 8  |
| <b>Figure S6</b> Module 3 - PySEBS calculation and processing user graphical interface..                                                                                                                             | 13 |
| <b>Figure S7</b> The calculation process of surface energy balance system and the steps of<br>PySEBS software implementation.....                                                                                    | 15 |
| <b>Figure S8</b> V3.0_station_jls.csv file structure diagram .....                                                                                                                                                   | 30 |
| <b>Figure S9</b> Structure of the path to the initial input data .....                                                                                                                                               | 31 |
| <b>Figure S10</b> Schematic diagram of the structure of folder <b>1RemoteSensingData/</b> and<br>folder <b>2MeteorologicalData/</b> .....                                                                            | 32 |
| <b>Figure S11</b> The example format of the meteorological data in replacement for the V3.0<br>data in <b>1RawData/</b> .....                                                                                        | 33 |
| <b>Figure S12</b> Schematic diagram of the structure of folders <b>3PySEBSInputData/</b> ,<br><b>4PySEBSOutputData/</b> , and <b>5sum_ET<sub>a</sub>/</b> , <b>6sum_ET<sub>o</sub>/</b> , and <b>7sum_Pre/</b> ..... | 36 |
| <b>Table S1</b> Basic information on MODIS products .....                                                                                                                                                            | 5  |
| <b>Table S2</b> The most suitable interpolation method for each parameter .....                                                                                                                                      | 11 |
| <b>Table S3</b> Comparison of interpolation methods for each parameter .....                                                                                                                                         | 11 |
| <b>Table S4</b> Formula and source information .....                                                                                                                                                                 | 28 |
| <b>Table S5</b> Description of meteorological data parameters of the files in folder<br><b>1RawData/</b> (e.g., 2019.csv).....                                                                                       | 34 |
| <b>Table S6</b> Description of the parameters of the file in folder <b>2SourceData/</b> (e.g.,<br>ET <sub>o</sub> _2019.csv).....                                                                                    | 34 |

## 1. Installing the PySEBS and software requirements

The PySEBS is a software that can be used to calculate actual evapotranspiration (ET<sub>a</sub>) on a spatial scale based on the Surface Energy Balance System model (SEBS). The software is written in Python 2.7.14 due to Python (2.7) being the latest version supported by ArcGIS 10.1-10.6. Since ET<sub>a</sub> is calculated on a spatial scale, the software operation utilizes some of the built-in tools in ArcGIS and the proper operation of these tools depends on calling of the Arcpy package in ArcGIS. Therefore, the user needs to ensure that the ArcGIS software is installed successfully.

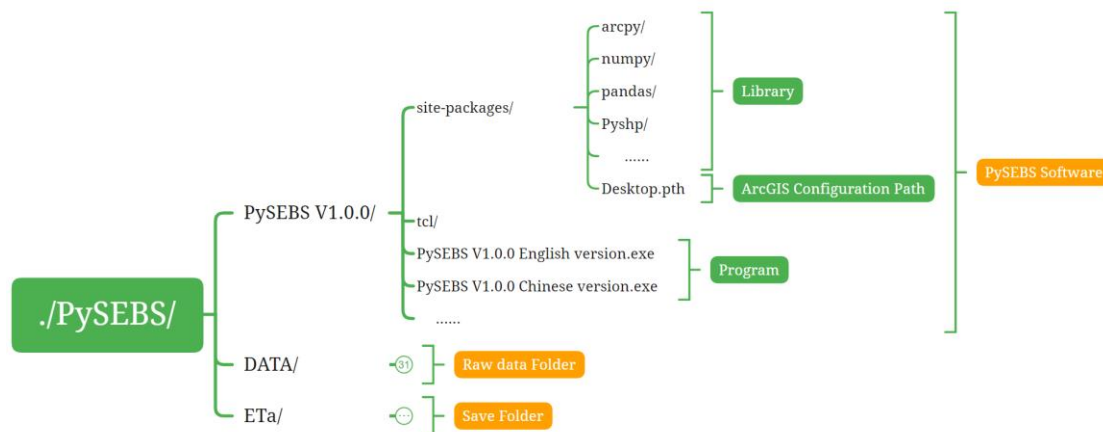

**Figure S1** Schematic diagram of the PySEBS software file structure

The PySEBS software is compressed into a **PySEBS V1.0.0.zip** file. The schematic diagram of PySEBS file structure is shown in Figure S1. The schematic box labeled **./PySEBS/** represents a folder named PySEBS in the working directory, where the PySEBS 1.0.0.zip file will be stored after extraction. The PySEBS folder contains two parts: the **PySEBS V1.0.0.exe** program; and the site-packages folder containing the code libraries (arcpy package, numpy package, pandas package, Pyshp package, etc.) and the configuration **Desktop.pth** file.

To successfully run the software, the file path of the bin folder in the ArcGIS installation directory must be added to the **Desktop.pth** file so that the arcpy packages can be properly called (see Figure S2 for the procedure). The path of the bin folder in the ArcGIS installation directory is usually: **.\ArcGIS\Desktop10.6\bin**; and the location of the **Desktop.pth** file is: **.\PySEBS\site-packages**.

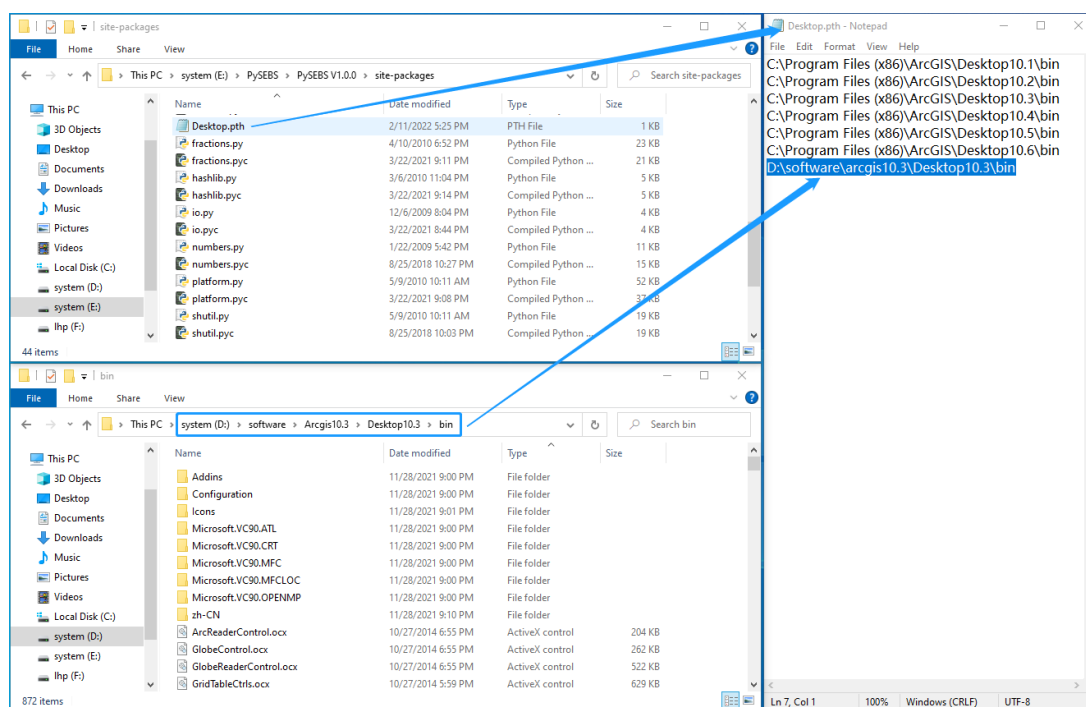

**Figure S2** The path to the bin folder in the ArcGIS installation directory, and add the bin folder to the Desktop.pth file

## 2. Graphical User Interface Introduction

PySEBS software is a concise and straightforward scientific computing tool. It contains one main interface (Figure S3) and three sub-interfaces (Figs. 4-6). The main interface consists of three button controls: the remote sensing data processing module button, the meteorological data processing module button, and the PySEBS calculation and processing module button. Each button control accesses the corresponding module (sub-interface): Module 1 - Remote Sensing Data Processing interface, Module 2 - Meteorological Data Processing interface, and Module 3 - PySEBS Calculation Procedure interface.

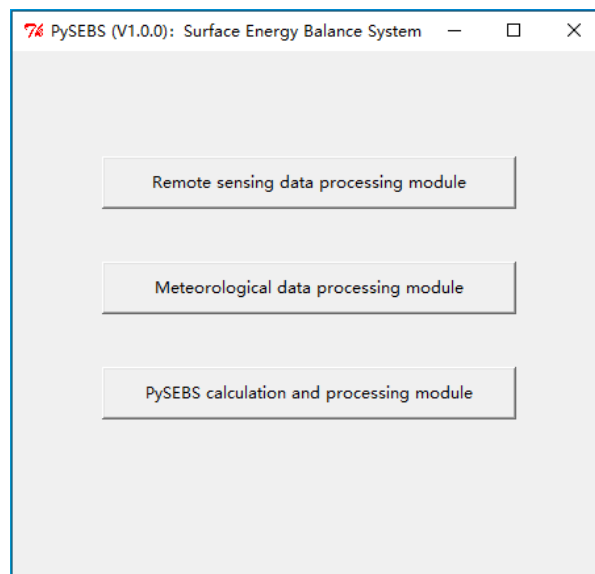

**Figure S3** Main menu of PySEBS software

The main functions of Module 1 and Module 2 are to provide properly processed and formatted input data for use in Module 3. Module 3 is used to calculate ET<sub>a</sub> on a daily/monthly/annual scale or for any period of time within a year and across years based on the input data (raster data) prepared by Modules 1 and 2. There is no processing priority between Modules 1 and 2. Moreover, there are common properties configured for all three modules, including time setting of the start and end year, file and folder pathway settings, selection of processing method, and information output.

Detailed instructions and notes for usage of each Module are provided below:

## 2.1 Module 1 - Remote Sensing Data Processing

Module 1 is used to process remote-sensed data and generate the daily data files in **.asc** format for input into Module 3 (Figure S4). Module 1 can only process data on an annual basis, and therefore the user must arrange the downloaded remote sensing files in specific folders by data type and by the year. For example, the path to MOD09A1 remote sensing data for the year of 2019 should be **.PySEBS\DATA\RemoteSensingData\MOD09A1\2019**; and the path to the MOD11A2 remote sensing data for the year of 2019 should be **.PySEBS\DATA\RemoteSensingData\MOD11A2\2019**.

The downloaded remote-sensed data needs to be pre-processed before it can be used in the PySEBS program. For demonstration, remote-sensed data were obtained from the National Aeronautics and Space Administration (NASA, <http://modis-land.gsfc.nasa.gov/>). In this example, images h26v04 and h27v04 were downloaded and the MRT (MODIS Reprojection Tool) projection tool was applied to preprocess the data for merging, resampling, format conversion, etc., and Cygwin software was used for batch processing (Table S1 for specific parameters). The purpose of pre-processing is to convert the remote sensing data from hierarchical data format (**.hdf**) format to raster files (**.tif**). The location of the **.tif** file will be in the same folder as the **.hdf** file, and the name of the preprocessed **.tif** file must contain the date information string (7 digits) of the corresponding data; an example file name is **MOD09A1\_2019001.sur\_refl\_b01.tif**.

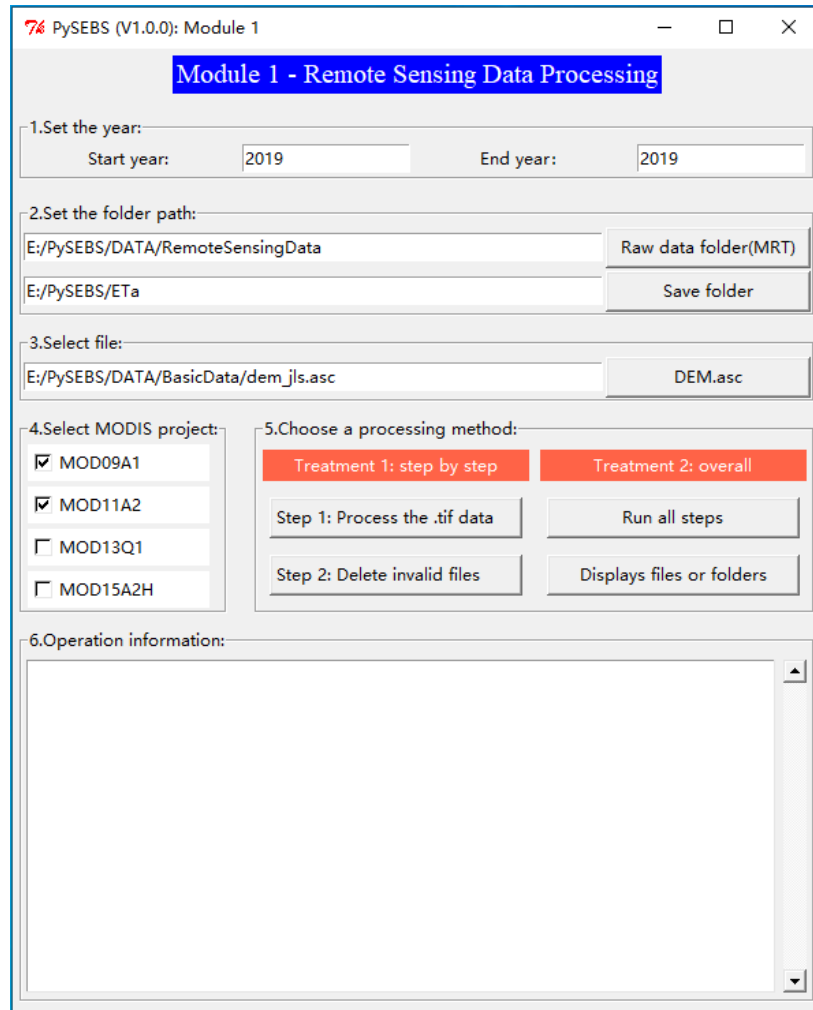

**Figure S4** Module 1 - remote sensing data processing graphical user interface

**Table S1** Basic information on MODIS products

| Products | Surface characteristics parameters                     | Temporal resolution | Spatial resolution |
|----------|--------------------------------------------------------|---------------------|--------------------|
| MOD09A1  | Surface albedo (Band 1-7)<br>Solar zenith angle (Szen) | 8 d                 | 500 m              |
| MOD11A2  | Surface temperature (lst)                              | 8 d                 | 1000 m             |

**The following describes the procedure for remote sensing data processing:**

1. Locate all processed **.tif** files and copy them to the designated folder to preserve the integrity of the original data.

2. Clip all **.tif** files using the **DEM.asc** file of the study area to isolate the only the remote-sensed data in the study area.

3. Assign all invalid values as NoData (setnull) to prevent the influence of spurious values on the final calculation results of ET<sub>a</sub>. The invalid values of “szen” parameter in MOD09A1 and “LST” parameter in MOD11A2 are 0; the invalid value of the band1-band7 parameter in MOD09A1 is -28672; the invalid value of “Fpar” parameter in MOD15A2H is 255; the invalid value of NDVI parameter in MOD13Q1 is -3000.

4. Convert **.tif** format files to **.asc** format.

5. Rename the files and save them as daily data in the required format.

**Module 1 contains 6 label frames with the following corresponding functions:**

1. The **Set the year** section defines the period of calculation, the **Start year** input box requires the users to specify the start year of the data processing; the **End year** input box requires the users to specify the end year of the data processing (Figure S4).

2. The **Raw data folder (MRT)** button in the **Set the folder path** section indicates the folder where the output data will be stored following MRT pre-processing; the **Save folder** button indicates the folder where the processed results are saved, and if this folder does not exist, the folder will be automatically created in the corresponding path.

3. The **DEM.asc** button in the **Select file** section is used to select the **DEM.asc** file of the study area, which is used to clip the remote sensing data within the study area.

4. The **Select MODIS project** section that contains checkboxes for MOD09A1, MOD11A2, MOD13Q1, and MOD15A2H options, which represent the types of remote-sensed data to be processed. During computing in this case study, the PySEBS model only used MOD09A1 and MOD11A2, so the default setting was selected for these two options. The remaining two options can be used in other studies.

5. The **Choose a processing method** section contains two data processing methods; “Treatment 1: step by step” means the data will be processed step by step, and “Treatment 2: overall” in which all steps will be processed (Figure S4). The **Step 1:**

**Process the .tif data** button performs a series of remote sensing data processing; The **Step 2: Delete invalid files** button deletes the transitional files generated during the processing of remote-sensed data, which is recommended due to the large amount of memory occupied by remote sensing. The **Run all steps** button proceeds to run Step 2 after the completion of Step 1. The **Display files or folders** button is a test button used to output the path of the selected files or folders, but does perform any actual computing processes.

6. The **Operation information** displays software prompt messages during the operation process, which is used to reveal the progress information.

## 2.2 Module 2 - Meteorological Data Processing

The function of Module 2 is to process the meteorological data and generate the daily file in **.asc** format required by Module 3 (Figure S5). The meteorological data used in this study is China's surface climate data daily value data set (V3.0), which is derived from the Chinese National Meteorological Information Center (<http://data.cma.cn/site/index.html>); the platform contains the daily meteorological data from 824 reference weather stations. The meteorological data in the dataset includes atmospheric pressure, air temperature, precipitation, evaporation, sunshine hours, surface temperature, wind speed and direction, and relative humidity at each station. The downloaded original meteorological data is in **.txt** format and includes all meteorological stations in each folder, which need to be preprocessed. Once the downloaded V3.0 weather datasets are placed in the same folder, Module 2 can be used to process the raw data directly. If meteorological datasets from other sources are used, they need to be organized in **.csv** format and stored in the 1RawData folder. An example of the corresponding path may be: **.\\PySEBS\\ETa\\2MeteorologicalData\\1RawData\\2019.csv**.

### **The meteorological data will be processed as follows:**

1. Pre-processing of V3.0 raw meteorological data. The raw meteorological dataset V3.0. can only be calculated on an annual basis. If the xxxx.csv (xxxx stands for the year, e.g., 2019) already exists in the folder (\\PySEBS\\ETa\\2MeteorologicalData\\1RawData), no new file will be recreated, this

will help reduce computation time.

**PySEBS (V1.0.0): Module 2**

**Module 2 - Meteorological Data Processing**

1. Set the date:

Start date: 2019/1/1 End date: 2019/12/31

2. Set the folder path:

E:/PySEBS/DATA/MeteorologicalData Raw data folder

E:/PySEBS/ETa Save folder

3. Select file:

E:/PySEBS/DATA/BasicData/V3.0\_station\_jls.csv MeteorologicalStation.csv

E:/PySEBS/DATA/BasicData/dem\_jls.asc DEM.asc

E:/PySEBS/DATA/BasicData/WGS 1984.prj GCS1984.prj

4. Interpolation:

elements: methods:

Tem Kriging

Ws Idw

Pa Kriging

Roh Kriging

Rs Kriging

Rnl Kriging

Pre Idw

ETo Kriging

5. Choose a processing method:

Treatment 1: step by step Treatment 2: overall

Step 1: Processing the raw data

Step 2: Calculate the ETo

Step 3: Create SHP files

Step 4: Interpolation of elements

Step 5: Grid conversion to ASC

Step 6: Synthesize data every 8 days

Step 7: Grid conversion to ASC

Step 8: Save the ASC file

Step 9: Delete invalid files

Run all steps

Displays files or folders

6. Operation info:

Trend

Spline

Idw

No

**Figure S5** Module 2 - Meteorological data processing user graphical interface

2. Calculation of reference evapotranspiration (ET<sub>o</sub>) and the parameters that require interpolation. ET<sub>o</sub> and interpolation parameters can only be calculated on an annual basis. If the ET<sub>o</sub>\_xxxx.csv already exists in the folder (.\PySEBS\ETa\2MeteorologicalData\2SourceData), no file will be recreated.

3. Create a shapefile that includes all weather stations on a given day and define the projection to 1984.prj. The calculation can be done on a daily scale. No file will be

recreated if the shapefile already exists.

4. Interpolation is conducted for .shp files on a daily basis. If the interpolated file already exists, no file will be recreated.

5. The **GRID** format file can be converted to .asc format on a daily scale. If the .asc file already exists, no file will be recreated.

6. Synthesizing 8-day meteorological data. Since the temporal resolution of the remote sensing data is 8 days, the 8-day average of meteorological data will also be calculated. In this case, operations on a daily basis are allowed. If the 8-day average file already exists, no file will be recreated. Since the parameters Pre and ET<sub>o</sub> are not involved in the operations of the PySEBS model, these two parameters do not perform processes 6 to 9.

7. Convert the 8-day average raster file to .asc format. It can be run on a daily basis. If the .asc file already exists, no file will be recreated.

8. Copy the .asc file to the designated folder. It can be run on a daily basis. No file will be recreated if the file already exists.

9. Delete the intermediate files generated during the operations to free up memory. When the date reaches the last day of the year, files generated in steps 4 to 7 will be deleted.

**Module 2 contains 6 label frames with the following corresponding functions:**

1. In the **Set the date** section, the **Start date** input box refers to the date when meteorological data processing begins; the **End date** input box refers to the date when meteorological data processing ends (Figure S5).

2. In the **Set the folder path** section, users can select a path where the raw meteorological dataset V3.0 can be saved using the **Raw data folder** button; the **Save folder** button indicates the folder where the processed meteorological results are saved, and if such folder does not exist, a new folder will be created automatically in the corresponding path to save the data.

3. In the **Select file** section, the **MeteorologicalStation.csv** button indicates the station zone number extracted from the meteorological dataset V3.0, which contains the information of the weather stations within the study area; the **DEM.asc** button allows the user to select the **DEM.asc** file of the study area, which has three purposes: 1) to define the output range of the study area during interpolation; 2) to multiply DEM.asc by 0 as an initial term of the accumulation; and 3) to be copied to the daily standard file and used as an input parameter for the PySEBS calculation. The **GCS1984.prj** button indicates the selection of the GCS1984.prj geographic coordinate system file, which is used to define the coordinate system in the interpolation process.

4. The **Interpolation** section contains two columns: the meteorological elements to be interpolated and the corresponding combobox of available interpolation methods. There are eight meteorological elements that need to be interpolated: Tem (mean air temperature, °C), Ws (wind speed at 2 m above earth's surface, m s<sup>-1</sup>), Pa (atmospheric pressure at 2 m above earth's surface, kPa), Roh (specific humidity, kg kg<sup>-1</sup>), Rs (daily mean shortwave radiation, MJ m<sup>-2</sup> day<sup>-1</sup>), Rnl (daily mean net outgoing longwave radiation, MJ m<sup>-2</sup> day<sup>-1</sup>), Pre (precipitation, mm), and ET<sub>o</sub> (reference evapotranspiration, mm). All the main parameters are required in the Module 3 calculation, except for precipitation and ET<sub>o</sub>. The corresponding interpolation methods include Kriging, Trend, Spline, and Inverse distance weight (Idw); in addition, the users may select **No** under the interpolation method, if certain parameters do not require interpolation.

Different parameters require different interpolation methods, and the default setting for each parameter in Module 2 is the most suitable interpolation method (Figure S5). The optimal interpolation method was selected based on the 10-fold cross validation results generated by different interpolation methods (Kriging, Trend, Spline, and Inverse distance weighting methods) using the meteorological data from 57 weather stations in Jilin province and its surrounding regions in 2017. The validation metrics include Mean Absolute Error (*MAE*), Mean Relative Error (*MRE*), Root Mean Square Error (*RMSE*), and Nash-Sutcliffe Efficiency (*NSE*). The optimal interpolation method for each parameter is shown in Tables 2 and 3.

**Table S2** The most suitable interpolation method for each parameter

| Parameter                                           | Interpolation method | Parameter                                       | Interpolation method |
|-----------------------------------------------------|----------------------|-------------------------------------------------|----------------------|
| Mean air temperature (Tem)                          | Kriging              | Wind speed (Ws)                                 | Idw                  |
| Atmospheric pressure (Pa)                           | Kriging              | Specific humidity (Roh)                         | Kriging              |
| Daily average net outgoing longwave radiation (Rnl) | Kriging              | Daily mean shortwave Radiation (Rs)             | Kriging              |
| Precipitation (Pre)                                 | Idw                  | Reference evapotranspiration (ET <sub>o</sub> ) | Kriging              |

**Table S3** Comparison of interpolation methods for each parameter

| Validation metrics | Mean air temperature (Tem) |        |        |        | Wind speed (Ws) |        |        |        |
|--------------------|----------------------------|--------|--------|--------|-----------------|--------|--------|--------|
|                    | Kriging                    | Trend  | Spline | Idw    | Kriging         | Trend  | Spline | Idw    |
| MAE                | 0.8639                     | 1.3015 | 1.1319 | 0.9344 | 0.4985          | 0.5372 | 0.7043 | 0.4823 |
| MRE                | -                          | -      | -      | -      | -               | -      | -      | -      |
| RMSE               | 1.1925                     | 1.7410 | 1.6028 | 1.2630 | 0.6815          | 0.7194 | 0.9802 | 0.653  |
| NSE                | 0.9925                     | 0.9841 | 0.9865 | 0.9916 | 0.5741          | 0.5253 | 0.1188 | 0.6089 |

  

| Validation metrics | Atmospheric pressure (Pa) |         |         |         | Relative humidity (Roh) |        |        |        |
|--------------------|---------------------------|---------|---------|---------|-------------------------|--------|--------|--------|
|                    | Kriging                   | Trend   | Spline  | Idw     | Kriging                 | Trend  | Spline | Idw    |
| MAE                | 668.46                    | 1188.45 | 886.25  | 794.42  | 0.0004                  | 0.0005 | 0.0005 | 0.0004 |
| MRE                | 0.0003                    | 0.0005  | 0.0007  | 0.0002  | 0.0126                  | 0.0194 | 0.0078 | 0.0256 |
| RMSE               | 982.62                    | 1601.77 | 1193.10 | 1084.37 | 0.0006                  | 0.0008 | 0.0008 | 0.0007 |
| NSE                | 0.7249                    | 0.2689  | 0.5944  | 0.6649  | 0.9856                  | 0.9779 | 0.9768 | 0.9846 |

  

| Validation metrics | Shortwave Radiation (Rs) |        |        |        | Net outgoing longwave radiation (Rnl) |        |        |        |
|--------------------|--------------------------|--------|--------|--------|---------------------------------------|--------|--------|--------|
|                    | Kriging                  | Trend  | Spline | Idw    | Kriging                               | Trend  | Spline | Idw    |
| MAE                | 15.497                   | 20.116 | 19.580 | 15.792 | 5.5267                                | 7.1679 | 7.0491 | 5.6463 |
| MRE                | 22.710                   | 28.312 | 28.915 | 22.986 | 7.7102                                | 9.5248 | 9.8900 | 7.8061 |
| RMSE               | 0.1134                   | 0.1508 | 0.1386 | 0.1169 | 0.1121                                | 0.1502 | 0.1381 | 0.1156 |
| NSE                | 0.9822                   | 0.9734 | 0.9718 | 0.9817 | 0.9815                                | 0.9728 | 0.9701 | 0.9811 |

  

| Validation metrics | Precipitation (Pre) |  |  |  | Reference evapotranspiration (ET <sub>o</sub> ) |  |  |  |
|--------------------|---------------------|--|--|--|-------------------------------------------------|--|--|--|
|--------------------|---------------------|--|--|--|-------------------------------------------------|--|--|--|

| metrics     | Kriging | Trend  | Spline  | Idw    | Kriging | Trend  | Spline | Idw    |
|-------------|---------|--------|---------|--------|---------|--------|--------|--------|
| <i>MAE</i>  | -       | 1.5790 | 1.6705  | 1.2271 | 0.2680  | 0.3619 | 0.3428 | 0.2751 |
| <i>MRE</i>  | -       | 5.0624 | 6.1559  | 4.5141 | 0.0381  | 0.0622 | 0.0272 | 0.0425 |
| <i>RMSE</i> | -       | -      | -       | -      | 0.4007  | 0.5199 | 0.5229 | 0.4092 |
| <i>NSE</i>  | -       | 0.3334 | -0.2875 | 0.4878 | 0.9531  | 0.9211 | 0.9201 | 0.9511 |

5. The **Choose a processing method** section includes 2 data processing treatments: **Treatment 1: step by step** indicates the data can be processed step by step; **Steps 1-9** represent a series of processing steps for meteorological data, which are described previously. **Treatment 2: overall** means to process data at once; **Run all steps** means to run **Steps 1-9** in order. **Display files or folders** is a test button to output the path of selected files and folders, which is not involved in the calculation. If the users select “Treatment 1”, the next step cannot be proceeded until the previous step is finished. However, some procedures are very time-consuming, such as interpolation. By contrast, “Treatment 2” performs more efficiently in data processing.

6. **Operation information** section shows system information during the software operation to indicate progress information.

### 2.3 Module 3 - PySEBS Calculation Procedure

Module 3 uses the daily input data (in .asc format) generated by Module 1 and Module 2 to calculate ET<sub>a</sub> on a daily/monthly/annual basis or for a specified period of time (Figure S6). The PySEBS model requires 15 necessary parameters. Module 1 provides 8 essential parameters, including 7 parameters from MOD09A1 (Band1, Band2, Band3, Band4, Band5, Band7, and Szn) and 1 parameter from MOD11A2 (Lst). Module 2 provides 7 essential parameters, including the DEM parameter and 6 meteorological related parameters (Tem, Ws, Pa, Roh, Rs, and Rnl). Moreover, there are 2 non-essential parameters, Pre and ET<sub>o</sub>, which are not involved in the PySEBS calculation process.

**Module 3 includes 5 label frames, with the following corresponding functions:**

1. In the **Set the date** section, users can specify the starting and ending dates of the data processing.

2. In the **Select folder path and file** section, the **Save folder** button allows the users to select the path, where the PySEBS input files (folder 3PySEBSInputData) and output files (folder 4PySEBSOutputData) will be stored; if the folder for output data does not exist, a new folder will be created in the corresponding path. The **DEM.asc** button means to select the DEM.asc file for the study area, which can be used as the initial term of the accumulation after multiplying the DEM.asc by 0.

**PySEBS (V1.0.0): Module 3**

**Module 3 - PySEBS Calculation Procedure**

1. Set the date:

Start date: 2019/1/1 End date: 2019/12/31

2. Select folder path and file:

E:/PySEBS/ETa Save folder

E:/PySEBS/DATA/BasicData/dem\_jls.asc DEM.asc

3. Choose a processing method:

Treatment 1: step by step Treatment 2: overall

Calculate daily ETa Run all steps

Calculate monthly/annual ETa Displays files or folders

4. Calculating the cumulative evapotranspiration for a period within a year:

Cumulative projects: Start date: End date:

☒ ETa 2019/1/1 2019/12/31

☐ ETo Calculate (monthly/annual) Calculate (period)

☐ Pre

5. Operation information:

**Figure S6** Module 3 - PySEBS calculation and processing user graphical interface

3. The **Choose a processing method** section includes 2 data processing methods: **Treatment 1: Step by step** means to process the data in separate steps; **Treatment 2: overall** means to run all steps automatically. **Calculate daily ET<sub>a</sub>** button indicates to calculate daily ET<sub>a</sub>; the **Calculate monthly/annual ET<sub>a</sub>** button indicates to calculate monthly/annual ET<sub>a</sub>; the **Run all steps** button indicates to calculate the daily, monthly, and annual ET<sub>a</sub> at the same time; the **Display files or folders** is a test button, which is used to output the path of the selected files or folders and is not involved in the software calculation process.

4. In the **Calculating the cumulative evapotranspiration for a period within a year** section, the **Cumulation projects** contain three checkboxes (ET<sub>a</sub>, ET<sub>o</sub>, and Pre) representing the selection of the project to be accumulated; the users may specify the dates for the calculation period in the **Start date** and **End date** input boxes; the **Calculate (monthly/annual)** button indicates to calculate the monthly, and annual project at the same time; the **Calculate (period)** button indicates to calculate the cumulative project for a period of time within a year.

5. In the **Operation information** section, the system information can be shown to reveal the progress information.

### 3. PySEBS software theoretical foundation

The SEBS model as proposed by Su (2002) is a single-layer model based on the surface energy balance principle (Su, 2002), which consists of four components: 1) The determination of the land surface physical parameters based on the remotely sensed spectral reflectance and radiance; 2) The estimation of the roughness length for heat transfer; 3) The calculation of sensible heat flux; and 4) The calculation of latent heat flux. Compared with other single-layer models based on the energy balance principle, the PySEBS model has the advantage that the data in each grid is calculated independently, so that even if some grids have missing data on a certain day due to the influence of rain and clouds, the calculation in other grids will not be affected; this can maximize the utilization of the remote sensing data. The calculation process of the surface energy balance system and the implementation steps of PySEBS software are shown in Figure 7.

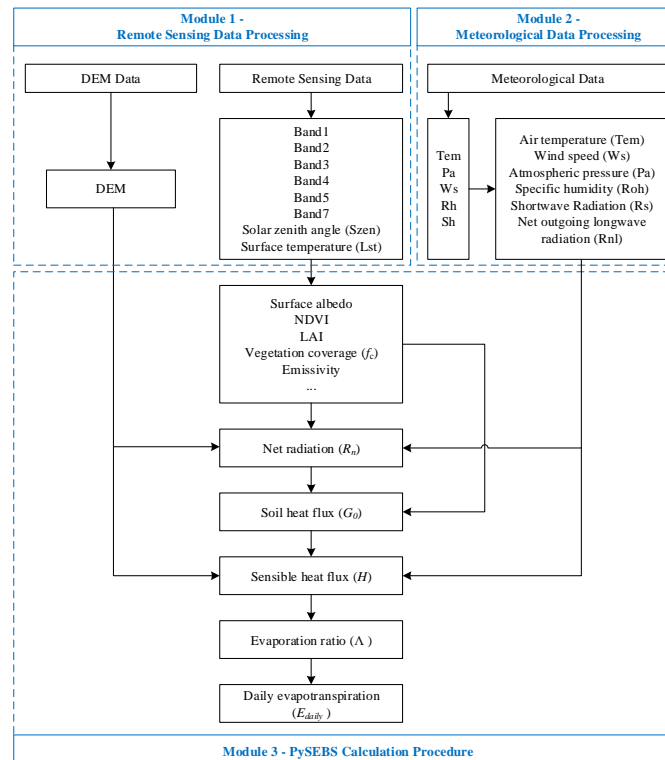

**Figure S7** The calculation process of surface energy balance system and the steps of PySEBS software implementation.

The net earth's surface radiation is the basis of various energy exchanges and can be divided into three parts: 1) The soil heat flux that warms the soil; 2) The sensible heat flux that warms the atmosphere; and 3) The latent heat flux of evapotranspiration (the latent heat of soil evaporation and crop transpiration). The equation for surface energy balance can be expressed as:

$$R_n = G_0 + H + \lambda E \quad (1)$$

where  $R_n$  is the net radiation ( $\text{W m}^{-2}$ ),  $G_0$  is the soil heat flux ( $\text{W m}^{-2}$ ),  $H$  is the sensible heat flux ( $\text{W m}^{-2}$ ), and  $\lambda E$  is the latent heat flux ( $\text{W m}^{-2}$ ), in which  $\lambda$  is the latent heat of evaporation ( $\text{J kg}^{-3}$ ) and  $E$  is the actual evapotranspiration ( $\text{mm d}^{-1}$ ). After calculating each parameter of the surface energy balance separately, the actual daily ET<sub>a</sub> can be obtained according to the constant evaporation ratio within one day.

### 3.1 Calculations of net radiation $R_n$

$$R_n = (1 - \alpha) \cdot R_{swd} + \varepsilon \cdot R_{lwd} - \varepsilon \cdot \sigma \cdot T_0^4 \quad (2)$$

where  $\alpha$  is surface albedo, a ratio of radiation reflected by the surface to global radiation (a sum of direct solar radiation and scattered radiation);  $R_{swd}$  and  $R_{lwd}$  ( $\text{W m}^{-2}$ ) represent downward solar radiation and downward long-wave radiation, respectively;  $\varepsilon$  is surface emissivity and can be classified into  $\varepsilon_{land}$  (surface emissivity of land) and  $\varepsilon_{water}$  (surface emissivity of water) according to different underlying surfaces;  $\sigma$  is the Stephan Boltzmann constant equal to  $5.67 \times 10^{-8}$  ( $\text{W m}^{-2} \text{K}^{-2}$ ); and  $T_0$  is the surface temperature (K).

The equations for calculating each component are as follows:

$$\alpha = 0.160 \cdot r_1 + 0.291 \cdot r_2 + 0.243 \cdot r_3 + 0.116 \cdot r_4 + 0.112 \cdot r_5 + 0.018 \cdot r_7 - 0.0015 \quad (3)$$

$$R_{swd} = I_{sc} \cdot d_r \cdot \cos \theta_z \cdot \tau \quad (4)$$

$$R_{lwd} = \varepsilon_a \cdot \sigma \cdot T_a^4 \quad (5)$$

$$\varepsilon = \begin{cases} \varepsilon_{land} & , \alpha \geq 0.035 \\ \varepsilon_{water} & , \alpha < 0.035 \end{cases} \quad (6)$$

$$\varepsilon_{land} = \begin{cases} 0.9825 - 0.051 \cdot Bred & , NDVI < 0.2 \\ 0.971 + 0.018 \cdot f_c & , 0.2 \leq NDVI \leq 0.5 \\ 0.990 & , NDVI > 0.5 \end{cases} \quad (7)$$

$$\varepsilon_{water} = 0.995 \quad (8)$$

$$\tau_{sw} = 0.75 + 2 \times 10^{-5} \cdot DEM \quad (9)$$

$$\varepsilon_a = 9.2 \cdot 10^{-6} \cdot T_a^2 \quad (10)$$

$$d_r = 1 + 0.033 \cdot \cos(2\pi \cdot dn / 365) \quad (11)$$

$$f_c = (NDVI - NDVI_{min})^2 / (NDVI_{max} - NDVI_{min})^2 \quad (12)$$

$$NDVI = (Bnir - Bred) / (Bnir + Bred) \quad (13)$$

where  $r_1$ ,  $r_2$ ,  $r_3$ ,  $r_4$ ,  $r_5$ , and  $r_7$  are wave bands 1-7 of MOD09A1;  $I_{sc}$  is a solar constant,  $I_{sc} = 1367$  (W m<sup>-2</sup>);  $d_r$  is orbital eccentricity correction coefficient of the earth;  $\theta_z$  is solar zenith angle derived from MOD09A1;  $\tau_{sw}$  is atmospheric transmissivity;  $\varepsilon_{land}$  and  $\varepsilon_{water}$  represent emissivity for land and emissivity for water, respectively;  $Bred$  is the infrared band i.e.,  $r_1$ ;  $f_c$  is vegetation coverage inversed through remote sensing data;  $DEM$  is the elevation (m);  $\varepsilon_a$  is atmospheric transmissivity;  $T_a$  is air temperature (K) at the reference elevation;  $dn$  refers to the day of year;  $NDVI$  is a normalized vegetation coverage index;  $NDVI_{min}$  and  $NDVI_{max}$  are the minimum and maximum values of vegetation coverage index, where  $NDVI_{min} = 0.2$  and  $NDVI_{max} = 0.5$ ;  $DEM$  is the elevation (m); and  $Bnir$  is the near-infrared band i.e.,  $r_2$ .

### 3.2 Calculations of soil heat flux $G_0$

$$G_0 = R_n \cdot [\Gamma_c + (1 - f_c) \cdot (\Gamma_s - \Gamma_c)] \quad (14)$$

where  $\Gamma_c$  is the ratio of soil heat flux to net radiation in the condition of total vegetation cover, ( $\Gamma_c = 0.05$ ), and  $\Gamma_s$  is a ratio of soil heat flux to net radiation in the condition of bare soil ( $\Gamma_s = 0.315$ ).

### 3.3 Calculations of sensible heat flux $H$

The theoretical calculation of the sensible heat flux is given by:

$$H = \rho C_p \frac{\theta_0 - \theta_a}{r_a} \quad (15)$$

$$r_a = \frac{1}{ku_*} \left[ \ln \left( \frac{z - d_0}{z_{0h}} \right) - \Psi_h \left( \frac{z - d_0}{L} \right) + \Psi_h \left( \frac{z_{0h}}{L} \right) \right] \quad (16)$$

where  $\rho$  for air density ( $\text{kg m}^{-3}$ );  $C_p$  for constant-pressure specific heat ( $\text{J kg}^{-1} \text{K}^{-1}$ );  $\theta_0$  for latent surface temperature (K);  $\theta_a$  for latent air temperature (K) at an elevation of  $z$ ;  $r_a$  for external resistance;  $k$  for Karman constant ( $k=0.4$ );  $u_*$  for friction velocity ( $\text{m s}^{-1}$ );  $z$  for reference measured elevation (m), generally between 2 and 10 m;  $d_0$  for zero plane displacement height (m);  $z_{0h}$  for scalar roughness height for heat transfer (m);  $\Psi_h$  for stability correction coefficients of heat exchange MOS; and  $L$  for Obukhov length (m).

The following equation group can be built simultaneously to solve the friction velocity and Obukhov length through repeated iterations:

$$u = \frac{u_*}{k} \left[ \ln \left( \frac{z - d_0}{z_{0m}} \right) - \Psi_m \left( \frac{z - d_0}{L} \right) + \Psi_m \left( \frac{z_{0m}}{L} \right) \right] \quad (17)$$

$$\theta_0 - \theta_a = \frac{H}{ku_* \rho C_p} \left[ \ln \left( \frac{z - d_0}{z_{0h}} \right) - \Psi_h \left( \frac{z - d_0}{L} \right) + \Psi_h \left( \frac{z_{0h}}{L} \right) \right] \quad (18)$$

$$L = -\frac{\rho C_p u_*^3 \theta_v}{kgH} \quad (19)$$

where  $u$  stands for wind velocity at the reference elevation ( $\text{m s}^{-1}$ );  $z_{0m}$  for roughness height for momentum transfer (m);  $\Psi_m$  for stability correction coefficients of momentum exchange MOS;  $\theta_v$  for latent near-surface virtual temperature (K); and  $g$  for gravitational acceleration, where  $g = 9.81 \text{ (m s}^{-2}\text{)}$ .

Calculation of vegetation height  $h$ :

$$h = h_{min} + \frac{(h_{max} - h_{min}) \cdot (NDVI - NDVI_{soil})}{(NDVI_{veg} - NDVI_{soil})} \quad (20)$$

where  $h$  refers to vegetation height (m);  $h_{min}$  represents the minimum height (m) of vegetation, and  $h_{min} = 0.0012$ ;  $h_{max}$  is the maximum height (m) of vegetation, and  $h_{max} = 2.5$ ;  $NDVI_{veg}$  stands for  $NDVI$  in a condition of total vegetation cover and  $NDVI_{veg} = 0.8$ ; Regarding pixels of completely bare soil,  $NDVI_{soil} = 0.0$ .

Calculation of zero plane displacement height  $d_0$ :

$$d_0 = d_{2h} \cdot h \quad (21)$$

$$d_{2h} = 1 - \frac{1 - \exp(-2 \cdot n_h)}{2 \cdot n_h} \quad (22)$$

$$n_h = \frac{C_d \cdot LAI}{2 \cdot u_{*2h}^2} \quad (23)$$

$$u_{*2h} = c_1 - c_2 \cdot \exp(-c_3 \cdot C_d \cdot LAI) \quad (24)$$

$$LAI = \left( \frac{NDVI \cdot (1 + NDVI)}{1 - NDVI} \right)^{1/2} \quad (25)$$

where  $d_{2h}$ ,  $n_h$ , and  $u_{*2uh}$  are all intermediate parameters; while  $c_1 = 0.320$ ,  $c_2 = 0.264$ , and  $c_3 = 15.1$ ;  $C_d$  is a leaf drag coefficient equal to 0.2; and  $LAI$  is the leaf area index.

Calculation of roughness height for momentum transfer  $z_{0m}$ :

$$z_{0m} = z_{02h} \cdot h \quad (26)$$

$$z_{02h} = (1 - d_{2h}) \cdot \exp(-k \cdot u_{*2uh}^{-1}) \quad (27)$$

where  $z_{02h}$  is intermediate parameter.

Calculation of scalar roughness height for heat transfer  $z_{0h}$ :

$$z_{0h} = z_{0m} / \exp(kB^{-1}) \quad (28)$$

$$kB^{-1} = \frac{kC_d}{4C_t \frac{u_*}{u(h)} (1 - e^{-n_{ec}/2})} f_c^2 + 2f_c f_s \frac{k \cdot u_* / u(h) \cdot z_{0m} / h}{C_t^*} + kB_s^{-1} f_s^2 \quad (29)$$

The first term of  $kB^{-1}$  represents total vegetation cover:

$$\frac{u_*}{u(h)} = d_1 - d_2 \cdot \exp(-d_3 \cdot C_d \cdot LAI) \quad (30)$$

$$n_{ec} = \frac{C_d \cdot LAI}{2u_*^2 / u(h)^2} \quad (31)$$

The second term of  $kB^{-1}$  represents partial vegetation cover:

$$f_s = 1 - f_c \quad (32)$$

$$C_t^* = \text{Pr}^{-2/3} \text{Re}^{-1/2} \quad (33)$$

$$\text{Re} = h \cdot u_* / \nu \quad (34)$$

$$u(h) = \frac{u \cdot \ln(2.446)}{\ln\left(\frac{z - d_0}{z_{0m}}\right)} \quad (35)$$

$$\nu = 1.327 \cdot 10^{-5} (p_0 / p) (T_a / T_{a0})^{1.81} \quad (36)$$

The third term of  $kB^{-1}$  represents total bare soil cover:

$$kB_s^{-1} = 2.46(\text{Re}_*)^{1/4} - \ln(7.4) \quad (37)$$

$$\text{Re}_* = h_s \cdot u_*^{\text{soil}} / \nu \quad (38)$$

$$u_*^{\text{soil}} = \frac{u \cdot k}{\ln\left(\frac{z}{h_s}\right)} \quad (39)$$

where  $B^{-1}$  stands for a dimensionless heat transfer coefficient, a reverse Stanton number;  $C_l$  stands for a heat transfer coefficient of leaves and  $C_l = 0.01$ ;  $u(h)$  represents horizontal wind speed ( $\text{m s}^{-1}$ ) at the top of the canopy;  $f_c$  represents vegetation coverage inversed by remote sensing data;  $C_t^*$  represents a heat transfer coefficient of soil; Besides,  $d_1 = 0.38$  and  $d_3 = 15.1$ ;  $\text{Pr}$  stands for a Prandtl number and  $\text{Pr} = 0.71$ ;  $\text{Re}$  is the Reynolds number of roughness under partial vegetation cover;  $\nu$  stands for aerodynamic viscosity coefficient;  $p_0$  is standard atmospheric pressure and  $p_0 = 101.325$  (kPa);  $p$  refers to atmospheric pressure at the reference elevation (kPa);  $T_a$  is air temperature at the reference elevation (K);  $T_{a0}$  stands for standard temperature and  $T_{a0} = 273.15$  (K);  $\text{Re}_*$  stands for Reynolds number of roughness;  $h_s$  stands for soil roughness and  $h_s = 0.009$  (m); and  $u_*^{\text{soil}}$  is the frictional wind speed under full bare soil cover ( $\text{m s}^{-1}$ ).

Calculation of the correction functions  $\Psi_m(y)$  and  $\Psi_h(y)$  of the Monin-Obukhov similarity (MOS) stability:

$$\Psi_m(y) = \begin{cases} -\left[ a_s \cdot y + b_s \cdot \left( y - \frac{c_s}{d_s} \right) \cdot \exp(-d_s \cdot y) + \frac{b_s \cdot c_s}{d_s} \right] & , y > 0 \\ \ln(a - y) - 3 \cdot b \cdot (-y)^{1/3} + \frac{b \cdot a^{1/3}}{2} \cdot \ln \left[ \frac{(1+x)^2}{(1-x+x^2)} \right] & , -b^{-3} \leq y \leq 0 \\ + 3^{1/2} \cdot b \cdot a^{1/3} \cdot \tan^{-1} \left[ \frac{(2x-1)}{3^{1/2}} \right] + \Psi_0 & \\ \Psi_m(b^{-3}) & , y \leq -b^{-3} \end{cases} \quad (40)$$

$$\Psi_h(y) = \begin{cases} -\left[ \left( 1 + \frac{2a_s}{3} y \right)^{1.5} + b_s \cdot \left( y - \frac{c_s}{d_s} \right) \cdot \exp(-d_s \cdot y) + \left( \frac{b_s \cdot c_s}{d_s} - 1 \right) \right] & , y > 0 \\ \left[ \frac{(1-d)}{n} \right] \cdot \ln \left[ \frac{(c + y^n)}{c} \right] & , y \leq 0 \end{cases} \quad (41)$$

$$x = (y / a)^{1/3} \quad (42)$$

$$\Psi_0 = -\ln a + 3^{1/2} \cdot b \cdot a^{1/3} \cdot \pi / 6 \quad (43)$$

where  $x$  and  $\Psi_0$  refers to integration constants;  $a=0.33$ ,  $b=0.41$ ,  $c=0.33$ ,  $d=0.057$ ,  $n=0.78$ ,  $a_s=1$ ,  $b_s=0.667$ ,  $c_s=5$ , and  $d_s=1$ .

Other parameters:

$$\rho = 1.293 \cdot \frac{p}{p_0} \cdot \frac{273.15}{T_a} \quad (44)$$

$$C_p = S \cdot C_{pw} + (1-S) \cdot C_{pd} \quad (45)$$

$$S = \frac{0.622 \cdot e_a}{p - (1 - 0.622) \cdot e_a} \quad (46)$$

$$e_a = e_s \cdot \frac{RH_{mean}}{100} \quad (47)$$

$$e_s = \frac{e^o(T_{max}) + e^o(T_{min})}{2} \quad (48)$$

$$e^o(T_{max}) = 0.618 \cdot \exp\left(\frac{17.27 \cdot (T_{max} - 273.15)}{(T_{max} - 273.15) + 237.3}\right) \quad (49)$$

$$e^o(T_{min}) = 0.618 \cdot \exp\left(\frac{17.27 \cdot (T_{min} - 273.15)}{(T_{min} - 273.15) + 237.3}\right) \quad (50)$$

$$\theta_0 = T_0 \cdot \left(\frac{p_0}{p_s}\right)^{0.286} \quad (51)$$

$$\theta_a = T_a \cdot \left(\frac{p_0}{p}\right)^{0.286} \quad (52)$$

$$\theta_v = T_a \cdot \left(\frac{p_0}{p}\right)^{0.286} \cdot (1 + 0.61 \cdot S) \quad (53)$$

$$p_s = 101.3 \cdot \left(\frac{293 - 0.0065 \cdot DEM}{293}\right)^{5.26} \quad (54)$$

where  $\rho$  is the density of air ( $\text{kg m}^{-3}$ );  $S$  refers to specific humidity ( $\text{kg kg}^{-1}$ );  $C_{pw}$  refers to special heat of vapor and  $C_{pw}=1846.0$  ( $\text{J kg}^{-1} \text{K}^{-1}$ );  $C_{pd}$  refers to special heat of dry air and  $C_{pd}=1005.0$  ( $\text{J kg}^{-1} \text{K}^{-1}$ );  $e_a$  and  $e_s$  are the actual and saturated water vapor pressure (kPa), respectively;  $RH_{mean}$  is the daily average relative humidity (%);  $T_{max}$  and  $T_{min}$  are the daily maximum and minimum air temperature (K) at the reference altitude, respectively;  $T_0$  is the surface temperature (K);  $p_s$  is the surface air pressure

(kPa); and  $DEM$  is the elevation (m).

### 3.4 Calculations of evaporation ratio $\Lambda$

The evaporation ratio is a specific value of energy utilized by actual evapotranspiration to the available energy. It can be calculated by using the following equations:

$$\Lambda = \frac{\lambda E}{H + \lambda E} = \frac{\lambda E}{R_n - G_0} = \frac{\Lambda_r \cdot \lambda E_{wet}}{R_n - G_0} \quad (55)$$

$$\Lambda_r = \frac{\lambda E}{\lambda E_{wet}} = 1 - \frac{\lambda E_{wet} - \lambda E}{\lambda E_{wet}} = 1 - \frac{H - H_{wet}}{H_{dry} - H_{wet}} \quad (56)$$

where  $\Lambda_r$  is the relative evaporation ratio;  $\lambda E_{wet}$  is the latent heat flux ( $\text{W m}^{-2}$ ) in a condition of humidity limit;  $H_{wet}$  is the sensible heat flux ( $\text{W m}^{-2}$ ) in a condition of humidity limit; and  $H_{dry}$  is the sensible heat flux ( $\text{W m}^{-2}$ ) in a condition of dry limit.

Regarding  $\lambda E_{wet}$  and  $H_{dry}$  in a dry limit, and  $\lambda E_{wet}$  and  $H_{wet}$  in a humidity limit, they are expressed in the equations below:

$$\lambda E_{dry} = R_n - G_0 - H_{dry} \equiv 0 \quad , \quad \text{or} \quad H_{dry} = R_n - G_0 \quad (57)$$

$$\lambda E_{wet} = R_n - G_0 - H_{wet} \quad , \quad \text{or} \quad H_{wet} = R_n - G_0 - \lambda E_{wet} \quad (58)$$

$$H_{wet} = \left( (R_n - G_0) - \frac{\rho_{wet} C_p}{r_{ew}} \cdot \frac{e_s - e}{\gamma} \right) / \left( 1 + \frac{\Delta}{\gamma} \right) \quad (59)$$

$$r_{ew} = \frac{1}{ku_*} \left[ \ln \left( \frac{z - d_0}{z_{0h}} \right) - \Psi_h \left( \frac{z - d_0}{L_w} \right) + \Psi_h \left( \frac{z_{0h}}{L_w} \right) \right] \quad (60)$$

$$L_w = - \frac{\rho_{wet} u_*^3}{kg \cdot 0.61 \cdot (R_n - G_0) / \lambda} \quad (61)$$

$$\rho_{dry} = \frac{(p - e_a) \cdot 1000}{R_d \cdot T_a} \quad (62)$$

$$\rho_{wet} = \frac{(p - 0.378 \cdot e_a) \cdot 1000}{R_d \cdot T_a} \quad (63)$$

$$e_a = p \cdot S \cdot \frac{R_v}{R_d} \quad (64)$$

$$e_s = 0.611 \cdot \exp\left(\frac{17.502 \cdot (T_0 - 273.15)}{(T_0 - 273.15) + 240.97}\right) \quad (65)$$

$$\gamma = \frac{C_p \cdot p}{[2.501 - 0.00234 \cdot (T_a - 273.15)] \cdot 10^6 \cdot 0.622} \quad (66)$$

$$\lambda = [2.501 - 2.361 \cdot 10^{-3} \cdot (T_a - 273.15)] \cdot 10^6 \quad (67)$$

$$\Delta = \frac{4098 \cdot \left[ 0.6108 \cdot \exp\left(\frac{17.27 \cdot (T_a - 273.15)}{(T_a - 273.15) + 237.3}\right) \right]}{((T_a - 273.15) + 237.3)^2} \quad (68)$$

where  $\rho_{wet}$  is the density of wet air ( $\text{kg m}^{-3}$ );  $\rho_{dry}$  is the density of dry air ( $\text{kg m}^{-3}$ );  $C_p$  for constant-pressure specific heat ( $\text{J kg}^{-1} \text{K}^{-1}$ );  $r_{ew}$  for external resistance at the wet limit;  $e_a$  and  $e_s$  are the actual and saturated water vapor pressure (kPa), respectively,  $e_s - e_a$  is the saturation water vapor pressure difference (kPa);  $\gamma$  is a constant of psychrometer ( $\text{Pa K}^{-1}$ );  $\Delta$  is the changing rate of vapor pressure versus temperature;  $L_w$  is the Obukhov length at the wet limit (m);  $u_*$  for friction velocity ( $\text{m s}^{-1}$ );  $k$  for Karman constant ( $k=0.4$ );  $g$  is the gravitational acceleration, where  $g = 9.81 \text{ (m s}^{-2}\text{)}$ ;  $\lambda$  is the latent heat of vaporization of water ( $\text{J kg}^{-1}$ );  $p$  refers to atmospheric pressure at the reference elevation (kPa);  $R_d$  is a gas constant of dry air and  $R_d=287.04 \text{ (J kg}^{-1} \text{K}^{-1}\text{)}$ ;  $T_0$  is the surface temperature (K);  $T_a$  is air temperature at the reference elevation (K);  $S$  refers to specific humidity ( $\text{kg kg}^{-1}$ ); and  $R_v$  is a gas constant of vapor and equals to  $461.5 \text{ (J kg}^{-1} \text{K}^{-1}\text{)}$ .

### 3.5 Calculations of daily evapotranspiration $E_{daily}$

The previously calculated net surface radiation, soil heat flux, and sensible heat flux are based on the instantaneous values at the moment of satellite transit. In contrast, in the PySEBS model, the daily evapotranspiration is calculated from the evaporation ratio with the daily average net radiation and daily average soil heat flux. The evapotranspiration ratio remains stable throughout the day (Shuttleworth, 1989; Sugita and Brutsaert, 1991; Crago, 1996; Li, 2014), and assuming that the evapotranspiration ratio is constant throughout the day, the daily evapotranspiration is calculated by the following equation:

$$E_{daily} = 8.64 \cdot 10^7 \cdot \Lambda \cdot \frac{\overline{R_n} - \overline{G_0}}{\lambda \rho_w} \quad (69)$$

$$\overline{R_n} = (1 - \alpha) K_{24}^\downarrow + \varepsilon L_{24} \quad (70)$$

$$\overline{G_0} \approx 0 \quad (71)$$

In the above equation,  $E_{daily}$  stands for the actual daily evapotranspiration (mm day<sup>-1</sup>);  $8.64 \times 10^7$  stands for a unit conversion coefficient;  $\Lambda$  stands for daily mean evaporation ratio that can be substituted by the evaporation ratio  $\Lambda$  figured out by the PySEBS model;  $\overline{R_n}$  stands for daily mean net radiation flux (W m<sup>-2</sup>); and  $\overline{G_0}$  stands for daily mean soil heat flux (W m<sup>-2</sup>), considering that the amount of heat absorbed and released by soil is approximately equal during the day, the daily mean soil heat flux is set to 0. Additionally,  $\lambda$  refers to the latent heat of vaporization of water and  $\lambda = 2.45 \cdot 10^6$  (J kg<sup>-1</sup>);  $\rho_w$  refers to the density of water and  $\rho_w = 1000$  (kg m<sup>-3</sup>);  $\alpha$  is the surface albedo (see Equation 3);  $K_{24}^\downarrow$  refers to incident global radiation (W m<sup>-2</sup>), which is obtained through the unit conversion of the incident solar radiation (MJ m<sup>-2</sup> day<sup>-1</sup>) expressed in the Penman-Monteith equation;  $\varepsilon$  is surface emissivity (see Equation 6, 7, 8); and  $L_{24}$  refers to daily net outgoing long-wave radiation (W m<sup>-2</sup>), which is obtained through the unit conversion of the net long-wave radiation (MJ m<sup>-2</sup> day<sup>-1</sup>) expressed in the Penman-Monteith equation.

The daily incident shortwave radiation  $K_{24}^\downarrow$  at the surface is calculated as follows:

$$K_{24}^{\downarrow} = \frac{R_s \cdot 10^6}{24 \cdot 3600} \quad (72)$$

$$R_s = R_a \cdot \tau \quad (73)$$

$$\tau = a_{s0} + b_{s0} \frac{n}{N} \quad (74)$$

$$R_a = \frac{24 \cdot 60}{\pi} \cdot G_{sc} \cdot d_r \cdot [\omega_s \cdot \sin(\varphi) \cdot \sin(\delta) + \cos(\varphi) \cdot \cos(\delta) \cdot \sin(\omega_s)] \quad (75)$$

$$d_r = 1 + 0.033 \cdot \cos\left(\frac{2\pi}{365} \cdot J\right) \quad (76)$$

$$\omega_s = \arccos[-\tan(\varphi) \cdot \tan(\delta)] \quad (77)$$

$$\varphi = \frac{latitude}{180} \cdot \pi \quad (78)$$

$$\delta = 0.409 \cdot \sin\left(\frac{2\pi}{365} \cdot J - 1.39\right) \quad (79)$$

$$N = \frac{24}{\pi} \cdot \omega_s \quad (80)$$

where  $R_s$  represents the incident solar radiation (MJ m<sup>-2</sup> day<sup>-1</sup>);  $R_a$  stands for extraterrestrial radiation (MJ m<sup>-2</sup> day<sup>-1</sup>); and  $\tau$  stands for atmospheric transmissivity. In addition, the constants  $a_s$  and  $b_s$  equal to 0.25 and 0.5, respectively.  $n$  and  $N$  are the actual and theoretical sunshine hours, respectively.  $G_{sc}$  is a solar constant and equals 0.0820 (MJ m<sup>-2</sup> min<sup>-1</sup>).  $d_r$  is a reciprocal value of the relative distance between the Sun and the Earth. Moreover,  $\omega_s$  refers to acronical angle (rad),  $\varphi$

refers to latitude (rad),  $\delta$  refers to solar declination (rad),  $J$  refers to the day of year, and *latitude* is the geographical latitude (°).

The daily net longwave radiation  $L_{24}$  at the surface is calculated as follows:

$$L_{24} = \frac{R_{nl} \cdot 10^6}{24 \cdot 3600} \quad (81)$$

$$R_{nl} = -\sigma \cdot \left( \frac{T_{max}^4 + T_{min}^4}{2} \right) \cdot (0.34 - 0.14 \cdot \sqrt{e_a}) \cdot \left( 1.35 \cdot \frac{R_s}{R_{so}} - 0.35 \right) \quad (82)$$

$$e_a = \frac{RH_{mean}}{100} \cdot \left[ \frac{e^o(T_{max}) + e^o(T_{min})}{2} \right] \quad (83)$$

$$R_{so} = (0.75 + 2 \cdot 10^{-5} \cdot DEM) \cdot R_a \quad (84)$$

$$e^o(T) = 0.6108 \cdot \exp \left( \frac{17.27 \cdot (T - 273.15)}{(T - 273.15) + 237.3} \right) \quad (85)$$

where  $R_{nl}$  represents net outgoing longwave radiation ( $\text{MJ m}^{-2} \text{ day}^{-1}$ );  $\sigma$  is the Stefan Boltzmann constant equal to  $4.903 \times 10^{-9} (\text{MJ m}^{-2} \text{ K}^{-4} \text{ day}^{-1})$ ;  $T_{max}$  and  $T_{min}$  are the daily maximum and minimum air temperature (K) at the reference altitude, respectively;  $e_a$  is the actual water vapor pressure (kPa);  $R_{so}$  is the clear-sky radiation ( $\text{MJ m}^{-2} \text{ day}^{-1}$ );  $R_s / R_{so}$  is relative shortwave radiation (limited to  $\leq 1.0$ );  $RH_{mean}$  is the daily average relative humidity (%);  $e^o(T_{max})$  and  $e^o(T_{min})$  are the saturated water vapor pressure (kPa) at the daily maximum and minimum temperatures, respectively;  $DEM$  is the altitude of the station (m); and  $e^o(T)$  is the arithmetic relationship between saturated water vapor pressure and temperature.

### 3.6 Source of formula

**Table S4** Formula and source information

| Formula                                    | Source   |
|--------------------------------------------|----------|
| 1, 2, 5, 10, 14, 17-19, 28, 29, 31-34, 36, | Su, 2002 |

---

|                                      |                                  |
|--------------------------------------|----------------------------------|
| 37, 55-61, 69-71                     | Liang, 2001                      |
| 3                                    | ILWIS software; Han et al., 2008 |
| 3, 6-8, 12, 13, 20-27, 30            | Yang, 2017                       |
| 4                                    | Wu, 2010                         |
| 4, 9                                 | FAO56, 1998                      |
| 11, 38, 39, 46-50, 54, 66, 68, 71-85 | Li, 2012                         |
| 15, 16, 35, 38, 39                   | Hao, 2018                        |
| 20, 30, 35, 38, 39, 67               | Jobson, 1982                     |
| 37, 44, 45, 51-53, 62-65             | Su, 2002; Hogstrom, 1988;        |
|                                      | Kader and Yaglom, 1990;          |
| 40-43                                | Beljaars and Holtslag, 1991;     |
|                                      | VandenHurk and Holtslag, 1997;   |
|                                      | Brutsaert, 1999                  |

---

Note: ILWIS software website (<https://52north.org/software/software-projects/ilwis>)

## 4. Initial input data

Input data required by Modules 1, 2, and 3 can be divided into three parts: the first part is the basic data, which includes the information file (V3.0\_station\_jls.csv) of weather stations for the V3.0 meteorological dataset within the study area (Figure S7 for the file structure), the study area DEM file (dem\_jls.asc), and the geographic coordinate system file (WGS 1984.prj); the second part is the remote sensing data, which includes MOD09A1 and MOD11A2; the third part is the meteorological data, which includes the raw data of V3.0 meteorological dataset. Meteorological data from other sources can also be used, the data needs to be prepared by the users following the format of 2019.csv and located in the corresponding folder.

The input data or files described above are all saved in the designated folders. Each module is connected to the file or the folder so that the data can serve as the input of the module. Specifically, the basic data is connected in a form of files; remote-sensed data and meteorological data are connected in a form of subdirectory.

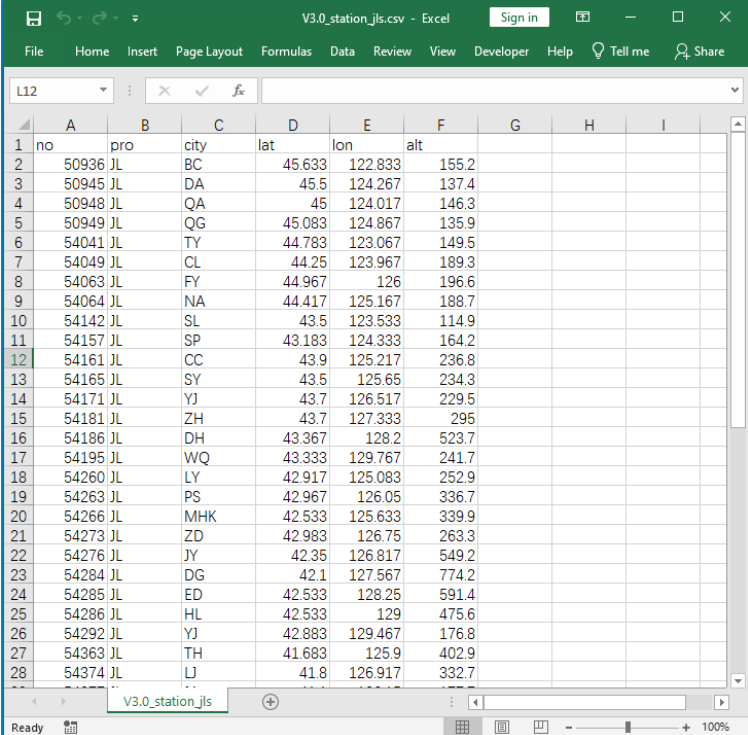

|    | A     | B   | C    | D      | E       | F     | G | H | I |
|----|-------|-----|------|--------|---------|-------|---|---|---|
| 1  | no    | pro | city | lat    | lon     | alt   |   |   |   |
| 2  | 50936 | JL  | BC   | 45.633 | 122.833 | 155.2 |   |   |   |
| 3  | 50945 | JL  | DA   | 45.5   | 124.267 | 137.4 |   |   |   |
| 4  | 50948 | JL  | QA   | 45     | 124.017 | 146.3 |   |   |   |
| 5  | 50949 | JL  | QG   | 45.083 | 124.867 | 135.9 |   |   |   |
| 6  | 54041 | JL  | TY   | 44.783 | 123.067 | 149.5 |   |   |   |
| 7  | 54049 | JL  | CL   | 44.25  | 123.967 | 189.3 |   |   |   |
| 8  | 54063 | JL  | FY   | 44.967 | 126     | 196.6 |   |   |   |
| 9  | 54064 | JL  | NA   | 44.417 | 125.167 | 188.7 |   |   |   |
| 10 | 54142 | JL  | SL   | 43.5   | 123.533 | 114.9 |   |   |   |
| 11 | 54157 | JL  | SP   | 43.183 | 124.333 | 164.2 |   |   |   |
| 12 | 54161 | JL  | CC   | 43.9   | 125.217 | 236.8 |   |   |   |
| 13 | 54165 | JL  | SY   | 43.5   | 125.65  | 234.3 |   |   |   |
| 14 | 54171 | JL  | YJ   | 43.7   | 126.517 | 229.5 |   |   |   |
| 15 | 54181 | JL  | ZH   | 43.7   | 127.333 | 295   |   |   |   |
| 16 | 54186 | JL  | DH   | 43.367 | 128.2   | 523.7 |   |   |   |
| 17 | 54195 | JL  | WQ   | 43.333 | 129.767 | 241.7 |   |   |   |
| 18 | 54260 | JL  | LY   | 42.917 | 125.083 | 252.9 |   |   |   |
| 19 | 54263 | JL  | PS   | 42.967 | 126.05  | 336.7 |   |   |   |
| 20 | 54266 | JL  | MHK  | 42.533 | 125.633 | 339.9 |   |   |   |
| 21 | 54273 | JL  | ZD   | 42.983 | 126.75  | 263.3 |   |   |   |
| 22 | 54276 | JL  | JY   | 42.35  | 126.817 | 549.2 |   |   |   |
| 23 | 54284 | JL  | DG   | 42.1   | 127.567 | 774.2 |   |   |   |
| 24 | 54285 | JL  | ED   | 42.533 | 128.25  | 591.4 |   |   |   |
| 25 | 54286 | JL  | HL   | 42.533 | 129     | 475.6 |   |   |   |
| 26 | 54292 | JL  | YJ   | 42.883 | 129.467 | 176.8 |   |   |   |
| 27 | 54363 | JL  | TH   | 41.683 | 125.9   | 402.9 |   |   |   |
| 28 | 54374 | JL  | LJ   | 41.8   | 126.917 | 332.7 |   |   |   |

**Figure S8** V3.0\_station\_jls.csv file structure diagram

Note: **no** represents station number, **pro** represents province, **city** represents city, **lat** represents latitude, **lon** represents longitude, and **alt** represents altitude.

The structure diagram of the path to the initial input data has shown in Figure S8, and **./PySEBS/** indicates that a folder named PySEBS is created in the project directory. The path to the basic data is **./PySEBS/DATA/BasicData/**. The path to the remote sensing data is **./PySEBS/DATA/RemoteSensingData/MOD09A1/2019/** and **./PySEBS/DATA/RemoteSensingData/MOD11A2/2019/**. The meteorological data is saved in a path of **./PySEBS/DATA/MeteorologicalData/**.

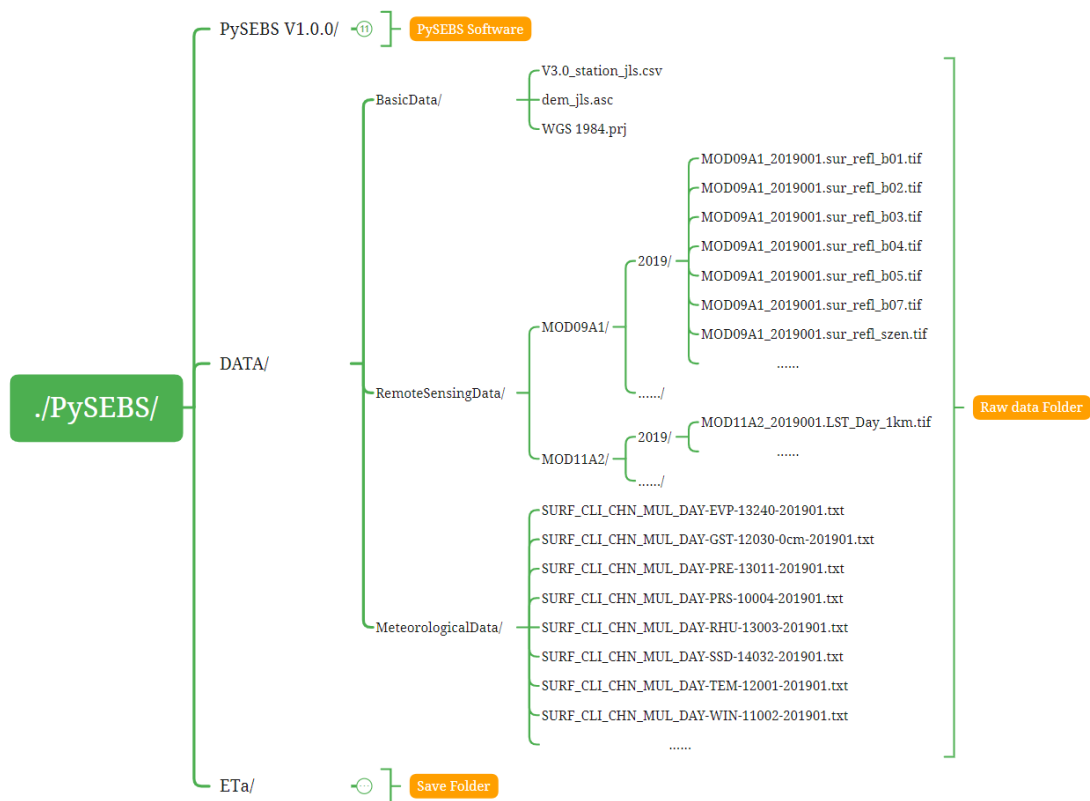

**Figure S9** Structure of the path to the initial input data

## 5. Output results

The **./PySEBS/ET<sub>a</sub>/** file path is a user-defined folder to save the output results, which will be created automatically if such a folder does not exist in the project directory. The folder **1RemoteSensingData/** is used to save the intermediate files generated during the remote sensing data processing in Module 1. The folder **2MeteorologicalData/** is used to save the intermediate files generated during the meteorological data processing in Module 2. The folder **3PySEBSInputData/** is used to save the final processing results of remote sensing and meteorological data. In addition, the folder **3PySEBSInputData/** also serves as the path of input files for Module 3. The **4PySEBSOutputData/** folder will store the daily ET<sub>a</sub> results, and the **5sum\_ET<sub>a</sub>/** folder will store the monthly and annual ET<sub>a</sub> results calculated by Module 3 (Figure S9). The **6sum\_ET<sub>o</sub>/** folder and the **7sum\_Pre/** folder are used to store cumulative reference evapotranspiration and precipitation, respectively.

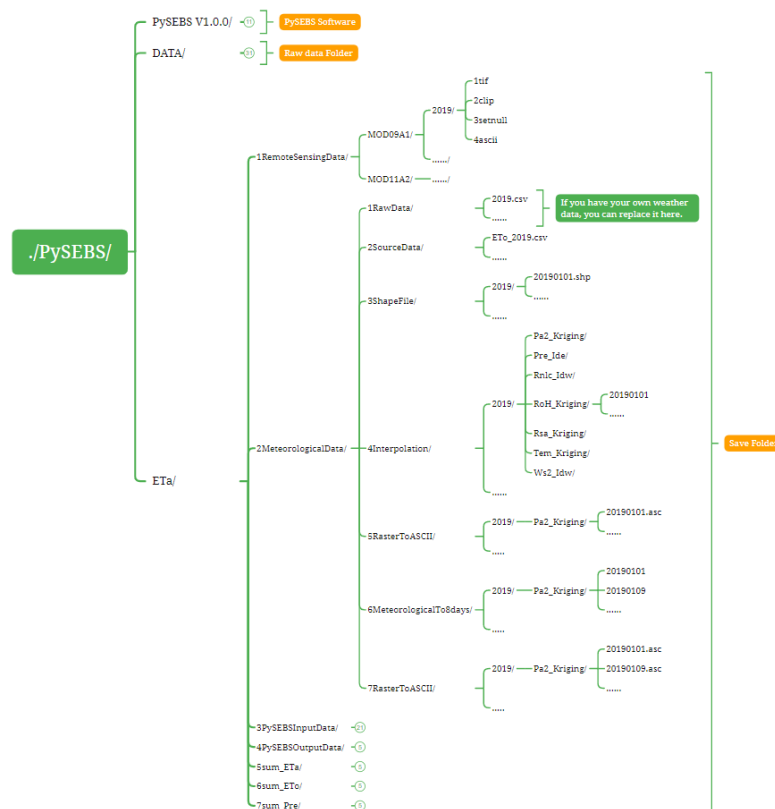

**Figure S10** Schematic diagram of the structure of folder **1RemoteSensingData/** and folder **2MeteorologicalData/**

As mentioned earlier, if meteorological data derived from other sources need to be used, the data must be prepared in a required format (Figure S10) and stored in the file path **2Meteorologicaldata/1RawData/** to replace the V3.0 meteorological data (Table S5). The files in the file path **2MeteorologicalData/2SourceData/** (e.g., ET<sub>o</sub>\_2019.csv) used the data in the **2Meteorologicaldata/1RawData/** folder as input and calculated the ET<sub>o</sub> and its process variables; the purpose of these files is to provide the six required meteorological parameters for **Module 3**. The calculation of ET<sub>o</sub> is also a strength of this software, if the users need to use ET<sub>o</sub> and other parameters in the calculation process, the information can be found in the folder of **2MeteorologicalData/2SourceData/** (Table S6).

2019.csv - Excel

Sign in

File Home Insert Page Layout Formulas Data Review View Developer Help Tell me what you want to do

Share

U9

|    | A     | B   | C    | D    | E      | F     | G    | H     | I   | J     | K     | L     | M    | N      | O  | P   | Q   | R |
|----|-------|-----|------|------|--------|-------|------|-------|-----|-------|-------|-------|------|--------|----|-----|-----|---|
| 1  | no    | pro | city | lat  | lon    | alt   | year | month | day | Tmax  | Tmin  | Tem   | Ws   | Pa     | Rh | Sh  | Pre |   |
| 2  | 50877 | HJ  | YL   | 46.3 | 129.58 | 100.1 | 2019 | 1     | 1   | -11.8 | -17.9 | -15.1 | 5.98 | 101.58 | 50 | 0.9 | 0   |   |
| 3  | 50877 | HJ  | YL   | 46.3 | 129.58 | 100.1 | 2019 | 1     | 2   | -9.8  | -18.8 | -14.3 | 3.07 | 101.7  | 62 | 7   | 0   |   |
| 4  | 50877 | HJ  | YL   | 46.3 | 129.58 | 100.1 | 2019 | 1     | 3   | -8    | -15.6 | -12.5 | 3.81 | 101.85 | 60 | 7.1 | 0   |   |
| 5  | 50877 | HJ  | YL   | 46.3 | 129.58 | 100.1 | 2019 | 1     | 4   | -7.4  | -16.2 | -11.7 | 3.44 | 101.04 | 70 | 4.8 | 0.4 |   |
| 6  | 50877 | HJ  | YL   | 46.3 | 129.58 | 100.1 | 2019 | 1     | 5   | -11.1 | -16.1 | -14.2 | 3.74 | 101.27 | 60 | 7   | 0   |   |
| 7  | 50877 | HJ  | YL   | 46.3 | 129.58 | 100.1 | 2019 | 1     | 6   | -10.3 | -18.5 | -14.8 | 3.44 | 101.64 | 58 | 7.1 | 0   |   |
| 8  | 50877 | HJ  | YL   | 46.3 | 129.58 | 100.1 | 2019 | 1     | 7   | -10.6 | -19.6 | -15.1 | 2.17 | 101.21 | 56 | 4.9 | 0   |   |
| 9  | 50877 | HJ  | YL   | 46.3 | 129.58 | 100.1 | 2019 | 1     | 8   | -10.7 | -19.3 | -14.9 | 3.81 | 101.14 | 57 | 6.7 | 0   |   |
| 10 | 50877 | HJ  | YL   | 46.3 | 129.58 | 100.1 | 2019 | 1     | 9   | -6.2  | -16.1 | -11.1 | 4.86 | 100.68 | 45 | 7.1 | 0   |   |
| 11 | 50877 | HJ  | YL   | 46.3 | 129.58 | 100.1 | 2019 | 1     | 10  | -3.3  | -14.3 | -8.9  | 3.22 | 100.54 | 53 | 7.3 | 0   |   |
| 12 | 50877 | HJ  | YL   | 46.3 | 129.58 | 100.1 | 2019 | 1     | 11  | -4.3  | -19.6 | -12.9 | 1.35 | 101.3  | 64 | 7.3 | 0   |   |
| 13 | 50877 | HJ  | YL   | 46.3 | 129.58 | 100.1 | 2019 | 1     | 12  | -3.4  | -20.3 | -14.3 | 0.45 | 101.16 | 67 | 7.1 | 0   |   |
| 14 | 50877 | HJ  | YL   | 46.3 | 129.58 | 100.1 | 2019 | 1     | 13  | -10.9 | -19.1 | -14.9 | 0.9  | 101.31 | 74 | 0   | 0   |   |
| 15 | 50877 | HJ  | YL   | 46.3 | 129.58 | 100.1 | 2019 | 1     | 14  | -7.7  | -16.7 | -11.5 | 1.27 | 101.14 | 75 | 0   | 0   |   |
| 16 | 50877 | HJ  | YL   | 46.3 | 129.58 | 100.1 | 2019 | 1     | 15  | -8.5  | -17.5 | -12.2 | 2.77 | 100.78 | 62 | 3.8 | 1.9 |   |
| 17 | 50877 | HJ  | YL   | 46.3 | 129.58 | 100.1 | 2019 | 1     | 16  | -10.6 | -18.1 | -15   | 4.11 | 100.3  | 51 | 4.6 | 0   |   |
| 18 | 50877 | HJ  | YL   | 46.3 | 129.58 | 100.1 | 2019 | 1     | 17  | -15.7 | -23.6 | -20.3 | 4.86 | 100.88 | 39 | 7.8 | 0   |   |
| 19 | 50877 | HJ  | YL   | 46.3 | 129.58 | 100.1 | 2019 | 1     | 18  | -12.2 | -21.5 | -17.3 | 3.22 | 101.38 | 45 | 7.9 | 0   |   |
| 20 | 50877 | HJ  | YL   | 46.3 | 129.58 | 100.1 | 2019 | 1     | 19  | -7.1  | -23.8 | -15.7 | 1.94 | 100.81 | 52 | 7.4 | 0   |   |
| 21 | 50877 | HJ  | YL   | 46.3 | 129.58 | 100.1 | 2019 | 1     | 20  | -11.3 | -18.2 | -15   | 2.77 | 100.33 | 62 | 3.1 | 0   |   |
| 22 | 50877 | HJ  | YL   | 46.3 | 129.58 | 100.1 | 2019 | 1     | 21  | -8.3  | -22.7 | -15.3 | 1.2  | 100.16 | 59 | 8   | 0   |   |
| 23 | 50877 | HJ  | YL   | 46.3 | 129.58 | 100.1 | 2019 | 1     | 22  | -4    | -17.4 | -9    | 2.77 | 99.8   | 56 | 0.9 | 0   |   |
| 24 | 50877 | HJ  | YL   | 46.3 | 129.58 | 100.1 | 2019 | 1     | 23  | -6.7  | -13.8 | -11.3 | 3.37 | 100.44 | 58 | 3.7 | 0   |   |
| 25 | 50877 | HJ  | YL   | 46.3 | 129.58 | 100.1 | 2019 | 1     | 24  | -7.5  | -18.7 | -12.7 | 2.54 | 101.19 | 55 | 7.9 | 0   |   |
| 26 | 50877 | HJ  | YL   | 46.3 | 129.58 | 100.1 | 2019 | 1     | 25  | -7    | -15.2 | -11.7 | 1.57 | 101.3  | 64 | 7.2 | 0   |   |
| 27 | 50877 | HJ  | YL   | 46.3 | 129.58 | 100.1 | 2019 | 1     | 26  | -6.1  | -16.6 | -11.6 | 2.54 | 101.32 | 62 | 8.2 | 0   |   |
| 28 | 50877 | HJ  | YL   | 46.3 | 129.58 | 100.1 | 2019 | 1     | 27  | -1.3  | -10.4 | -6.9  | 4.11 | 100.24 | 46 | 6.1 | 0   |   |
| 29 | 50877 | HJ  | YL   | 46.3 | 129.58 | 100.1 | 2019 | 1     | 28  | -6.8  | -14   | -10.6 | 4.11 | 100.22 | 61 | 7   | 0   |   |
| 30 | 50877 | HJ  | YL   | 46.3 | 129.58 | 100.1 | 2019 | 1     | 29  | -3.1  | -16.8 | -11.2 | 1.27 | 100.93 | 61 | 5   | 0   |   |

2019

Ready

100%

**Figure S11** The example format of the meteorological data in replacement for the V3.0 data in **1RawData/**

The six parameters required by the Module 3, all except Tem, Ws, and Pa need to be calculated based on the parameters in the **1RawData/** folder, with the following dependencies:

$$RoH = f(Pa, Rh, T_{min}, T_{max}) \quad (86)$$

$$Rs = f(lat, year, month, day, Sh) \quad (87)$$

$$Rnl = f(lat, year, month, day, Sh, Rh, T_{min}, T_{max}) \quad (88)$$

**Table S5** Description of meteorological data parameters of the files in folder **1RawData/** (e.g., 2019.csv)

| Parameters   | Explanation                     | Unit  | Necessity |
|--------------|---------------------------------|-------|-----------|
| <b>no</b>    | Station number                  | -     | yes       |
| <b>pro</b>   | Province                        | -     | no        |
| <b>city</b>  | city                            | -     | no        |
| <b>lat</b>   | Destination site longitude      | °     | yes       |
| <b>lon</b>   | Destination site latitude       | °     | no        |
| <b>alt</b>   | Destination site altitude       | °     | yes       |
| <b>year</b>  | Year                            | year  | yes       |
| <b>month</b> | Month                           | month | yes       |
| <b>day</b>   | Day                             | day   | yes       |
| <b>Tmax</b>  | Maximum air temperature         | °C    | yes       |
| <b>Tmin</b>  | Minimum air temperature         | °C    | yes       |
| <b>Tem</b>   | Daily average air temperature   | °C    | yes       |
| <b>Pa</b>    | Daily average wind speed at 2 m | Pa    | yes       |
| <b>Ws</b>    | Daily average air pressure      | m/s   | yes       |
| <b>Rh</b>    | Daily average relative humidity | %     | yes       |
| <b>Sh</b>    | Sunshine hours                  | hour  | yes       |
| <b>Pre</b>   | Precipitation                   | mm    | no        |

Note: Necessity means whether the parameter is a required parameter in the calculation of ET<sub>o</sub>.

**Table S6** Description of the parameters of the file in folder **2SourceData/** (e.g., ET<sub>o</sub>\_2019.csv)

| Parameters  | Explanation    | Unit | Necessity |
|-------------|----------------|------|-----------|
| <b>no</b>   | Station number | -    | no        |
| <b>pro</b>  | Province       | -    | no        |
| <b>city</b> | city           | -    | no        |

|               |                                               |                                      |     |
|---------------|-----------------------------------------------|--------------------------------------|-----|
| <b>lat</b>    | Destination site longitude                    | °                                    | yes |
| <b>lon</b>    | Destination site latitude                     | °                                    | yes |
| <b>alt</b>    | Destination site altitude                     | °                                    | no  |
| <b>year</b>   | Year                                          | year                                 | no  |
| <b>month</b>  | Month                                         | month                                | no  |
| <b>day</b>    | Day                                           | day                                  | no  |
| <b>Tmax</b>   | Maximum air temperature                       | °C                                   | no  |
| <b>Tmin</b>   | Minimum air temperature                       | °C                                   | no  |
| <b>Tem</b>    | Daily average air temperature                 | °C                                   | yes |
| <b>Ws</b>     | Daily average wind speed at 2 m               | m/s                                  | yes |
| <b>Pa</b>     | Daily average air pressure                    | kPa                                  | yes |
| <b>Rh</b>     | Daily average relative humidity               | %                                    | no  |
| <b>Sh</b>     | Sunshine hours                                | hour                                 | no  |
| <b>Pre</b>    | Precipitation                                 | mm                                   | no  |
| <b>RoH</b>    | Specific humidity                             | kg kg <sup>-1</sup>                  | yes |
| <b>e0Tmax</b> | Max saturation vapor pressure                 | kPa                                  | no  |
| <b>e0Tmin</b> | Min saturation vapor pressure                 | kPa                                  | no  |
| <b>e0Tem</b>  | Mean saturation vapor pressure                | kPa                                  | no  |
| <b>ea</b>     | Actual vapor pressure                         | kPa                                  | no  |
| <b>phi</b>    | Latitude with rad φ                           | rad                                  | no  |
| <b>J</b>      | Jay day                                       | day                                  | no  |
| <b>delta0</b> | Solar declination δ                           | rad                                  | no  |
| <b>ws0</b>    | Sunset hour angle                             | rad                                  | no  |
| <b>dr</b>     | Inverse relative distance earth_sun           | -                                    | no  |
| <b>N</b>      | Day light hours N                             | hour                                 | no  |
| <b>r</b>      | Psychrometric constant γ                      | kPa °C <sup>-1</sup>                 | no  |
| <b>Delta</b>  | Slope of Saturation vapor pressure curve Δ    | kPa °C <sup>-1</sup>                 | no  |
| <b>Ra</b>     | Daily extraterrestrial radiation              | MJ m <sup>-2</sup> day <sup>-1</sup> | no  |
| <b>Rs0</b>    | Daily average clearsky solar radiation        | MJ m <sup>-2</sup> day <sup>-1</sup> | no  |
| <b>Rs</b>     | Daily average solar radiation                 | MJ m <sup>-2</sup> day <sup>-1</sup> | yes |
| <b>Rns</b>    | Daily average net solar radiation             | MJ m <sup>-2</sup> day <sup>-1</sup> | no  |
| <b>Rnl</b>    | Daily average net outgoing longwave radiation | MJ m <sup>-2</sup> day <sup>-1</sup> | yes |
| <b>Rn</b>     | Daily average net radiation                   | MJ m <sup>-2</sup> day <sup>-1</sup> | no  |

|                       |                                      |                                      |    |
|-----------------------|--------------------------------------|--------------------------------------|----|
| <b>G</b>              | Daily average soil heat flux density | MJ m <sup>-2</sup> day <sup>-1</sup> | no |
| <b>ET<sub>o</sub></b> | Reference evapotranspiration         | mm d <sup>-1</sup>                   | no |

The **3PySEBSInputData/** folder stores the final processing results calculated from Module 1 and Module 2 and the input files from Module 3. The files are stored in the form of one folder per day and contain 15 .asc files that are required for the PySEBS model calculation and 1 optional precipitation file (pre.asc). The required parameters include 1 DEM file (dem.asc), 7 MOD09A1 files (band1.asc, band2.asc, band3.asc, band4.asc, band5.asc, band7.asc, and szen.asc), 1 MOD11A2 file (lst.asc), and 6 meteorological parameter files (tem.asc, ws.asc, pa.asc, roh.asc, rs.asc, and rnl.asc) (Figure S11).

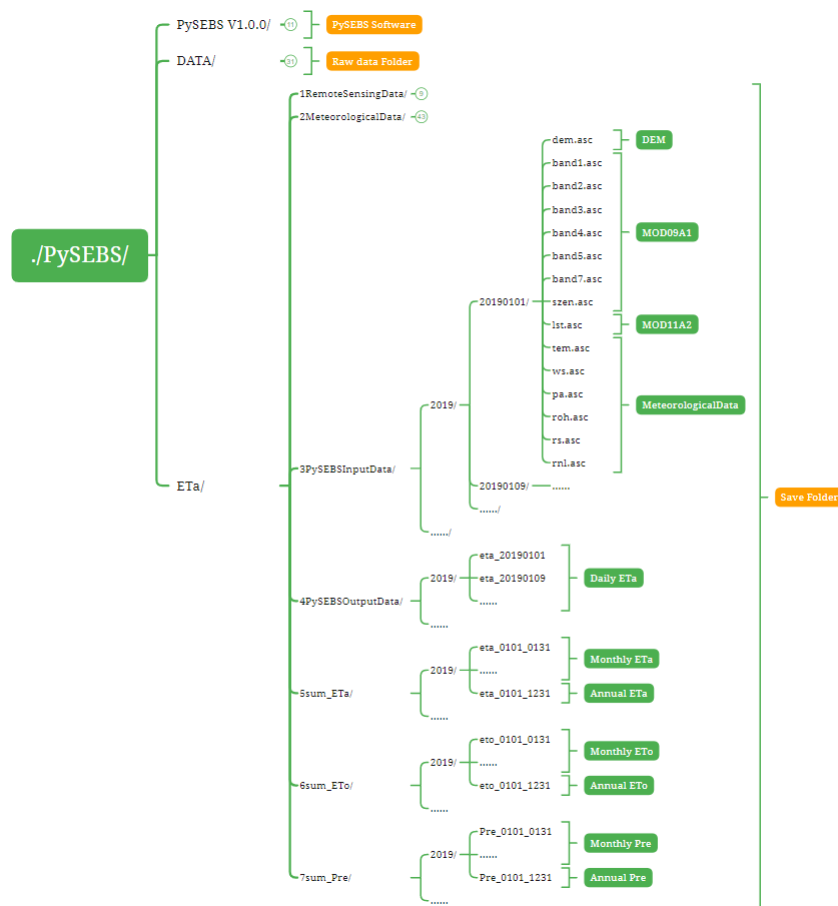

**Figure S12** Schematic diagram of the structure of folders 3PySEBSInputData/, 4PySEBSOutputData/, and 5sum\_ETa/, 6sum\_ETo/, and 7sum\_Pre/

## 6. References

1. Allen, R.G.; Pereira, L.S.; Raes, D., Smith, M. *Crop Evapotranspiration—Guidelines for Computing Crop Water Requirements—FAO Irrigation and Drainage Paper 56*; FAO: Rome, Italy, 1998.
2. Beljaars, A.C.M.; Holtslag, A.A.M. Flux parameterization over land surfaces for atmospheric models. *J. Appl. Meteorol.* **1991**, *30*, 327–341. [https://doi.org/10.1175/1520-0450\(1991\)030<0327:Fpolsf>2.0.Co;2](https://doi.org/10.1175/1520-0450(1991)030<0327:Fpolsf>2.0.Co;2).
3. Jobson, H.E. Evaporation into the atmosphere: Theory, history, and applications. *Eos Trans. Am. Geophys. Union* **1982**, *63*, 1223. <https://doi.org/10.1029/eo063i051p01223-04>.
4. Brutsaert, W. Aspects of bulk atmospheric boundary layer similarity under free-convective conditions. *Rev. Geophys.* **1999**, *37*, 439–451. <https://doi.org/10.1029/1999rg900013>.
5. Crago, R.D. Comparison of the evaporative fraction and the Priestley-Taylor alpha for parameterizing daytime evaporation. *Water Resour. Res.* **1996**, *32*, 1403–1409. <https://doi.org/10.1029/96wr00269>.
6. Han, X.P.; Wang, Y.Q.; Bao, L. Introduction of ILWIS functions and its scanning digital application. *Lab. Sci.* **2008**, *2*, 107–109. <https://doi.org/10.3969/j.issn.1672-4305.2008.02.043>.
7. Hao, J.W. Study on Evapotranspiration Based on SEBS Model in Handan. Master's thesis, Hebei University of Engineering, Handan, China, 2018.
8. Hogstrom, U. Non-dimensional wind and temperature profiles in the atmospheric surface layer: A re-evaluation. *Bound. Layer Meteor.* **1988**, *42*, 55–78. <https://doi.org/10.1007/bf00119875>.
9. Kader, B.A.; Yaglom, A.M. Mean fields and fluctuation moments in unstably stratified turbulent boundary layers. *J. Fluid Mech.* **1990**, *212*, 637–662. <https://doi.org/10.1017/s0022112090002129>.
10. Li, G. Estimation Evapotranspiration in Yingtan Agricultural Watershed using SEBAL and SEBS Model. Master's thesis, Nanjing University of Information Engineering, Nanjing, China, 2014.
11. Li, X. Estimation of Sensible Heat Flux Based on SEBS Model and Its Application for Drought Monitoring. Master's thesis, Nanjing University of Information Engineering, Nanjing, China, 2012.
12. Liang, S.L. Narrowband to broadband conversions of land surface albedo I Algorithms. *Remote Sens. Environ.* **2001**, *76*, 213–238. [https://doi.org/10.1016/s0034-4257\(00\)00205-4](https://doi.org/10.1016/s0034-4257(00)00205-4).
13. Shuttleworth, W.J. FIFE: The variation in energy partition at surface flux sites. *IAHS* **1989**, *186*, 67–74.
14. Su, Z. The Surface Energy Balance System (SEBS) for estimation of turbulent heat fluxes. *Hydrol. Earth Syst. Sci.* **2002**, *6*, 85–99. <https://doi.org/10.5194/hess-6-85-2002>.
15. Sugita, M.; Brutsaert, W. Daily evaporation over a region from lower boundary layer profiles measured with radiosondes. *Water Resour. Res.* **1991**, *27*, 747–752. <https://doi.org/10.1029/90wr02706>.
16. VandenHurk, B.; Holtslag, A.A.M. On the bulk parameterization of surface fluxes for various conditions and parameter ranges. *Bound. Layer Meteor.* **1997**, *82*, 119–134. <https://doi.org/10.1023/a:1000245600901>.

17. Wu, Y. Research on Retrieving and Spatial-Temporal Changes of Evaporation Estimation in the Yellow River Delta Based on Refined SEBS Model. Master's thesis, China University of Petroleum, Beijing, China, 2010.
18. Yang, X. Evapotranspiration Estimating using Remote Sensing and Spatial-Temporal Distribution of Evapotranspiration in Golmud River Basin Based on SEBS Model. Master's thesis, Chang'an University, Xi'an, China, 2017.
